# Supplementary material for: Highly efficient synthesis of sustainable bisphenols from hydroxycinnamic acids
Source: Royal Society of Chemistry journal article supplement (doi:10.1039/d3su00175j), 2023-01-01

## Supporting Information

### **Highly Efficient Synthesis of Sustainable Bisphenols from Hydroxycinnamic Acids**

*Cristian E. Zavala,<sup>a</sup> Natalie Vest,<sup>a,b</sup> Joshua E. Baca,<sup>a</sup> Derek D. Zhang,<sup>a</sup> K. Randall McClain,<sup>a</sup> and Benjamin G. Harvey<sup>a\*</sup>*

<sup>a</sup>US NAVY, NAWCWD, Research Department, Chemistry Division, China Lake, California 93555

<sup>b</sup>Texas A&M University, Chemistry Department, College Station, TX, USA

## Table of Contents

|                                                                |     |
|----------------------------------------------------------------|-----|
| Differential Scanning Calorimetry Results for Bisphenols ..... | S3  |
| GPC of PVP.....                                                | S8  |
| Crystallographic Data .....                                    | S9  |
| NMR Spectra .....                                              | S14 |

## DSC Thermal Analysis

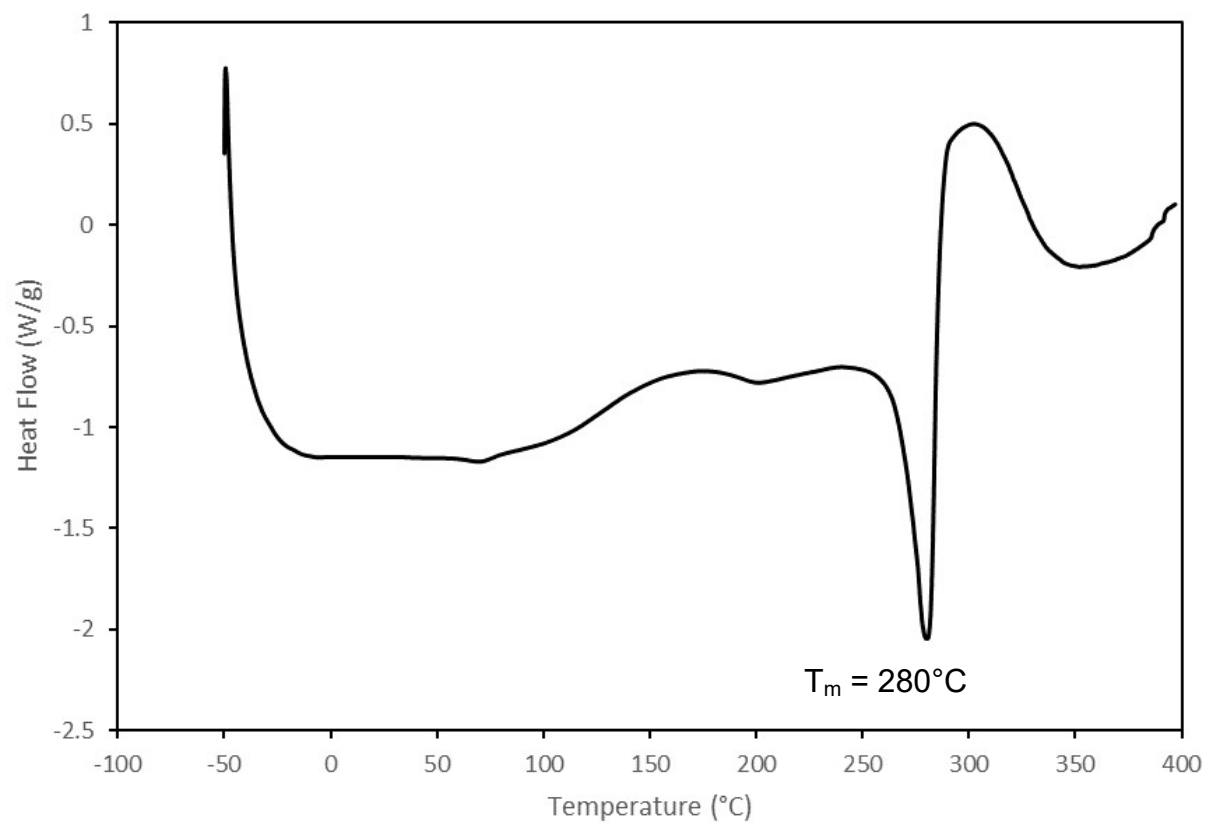

**Figure S1.** Differential Scanning Calorimetry (DSC) trace of compound **1**.

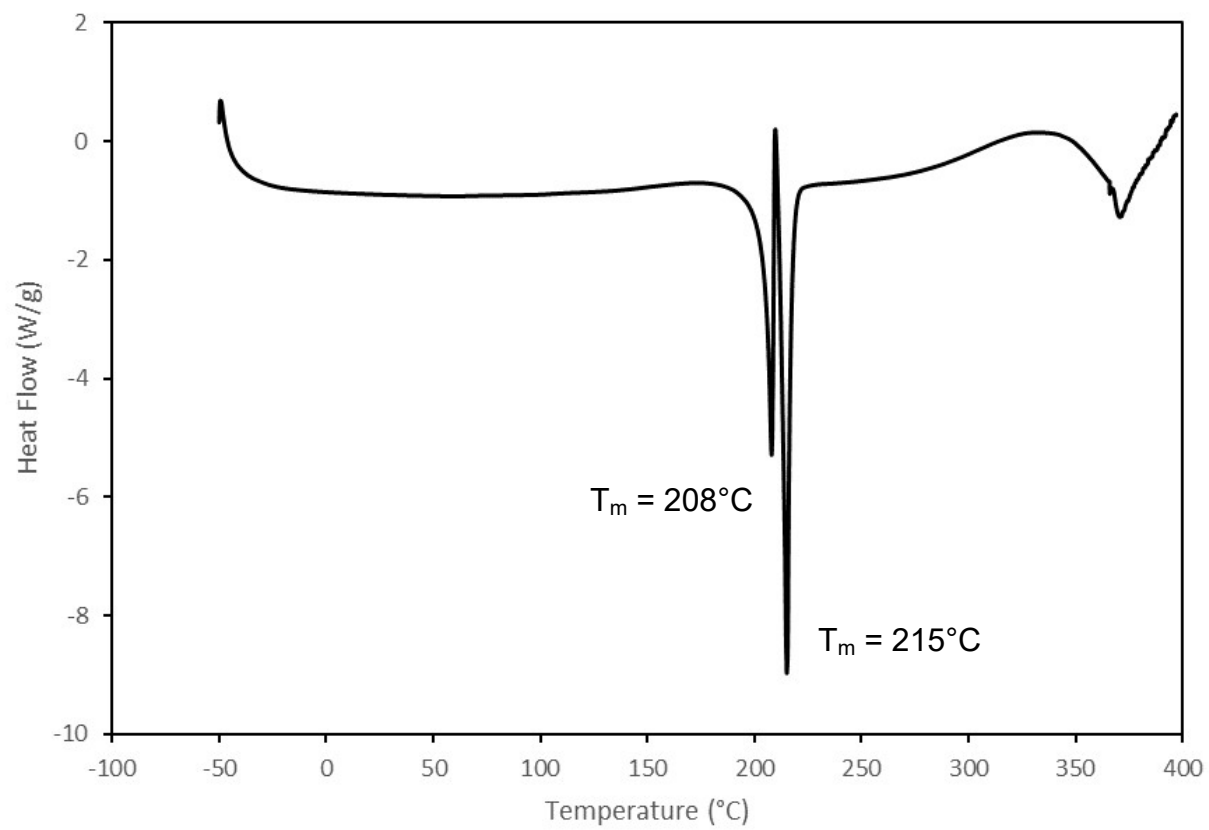

**Figure S2.** DSC trace of compound **2**.

**Figure S3.** DSC trace of compound **3**.

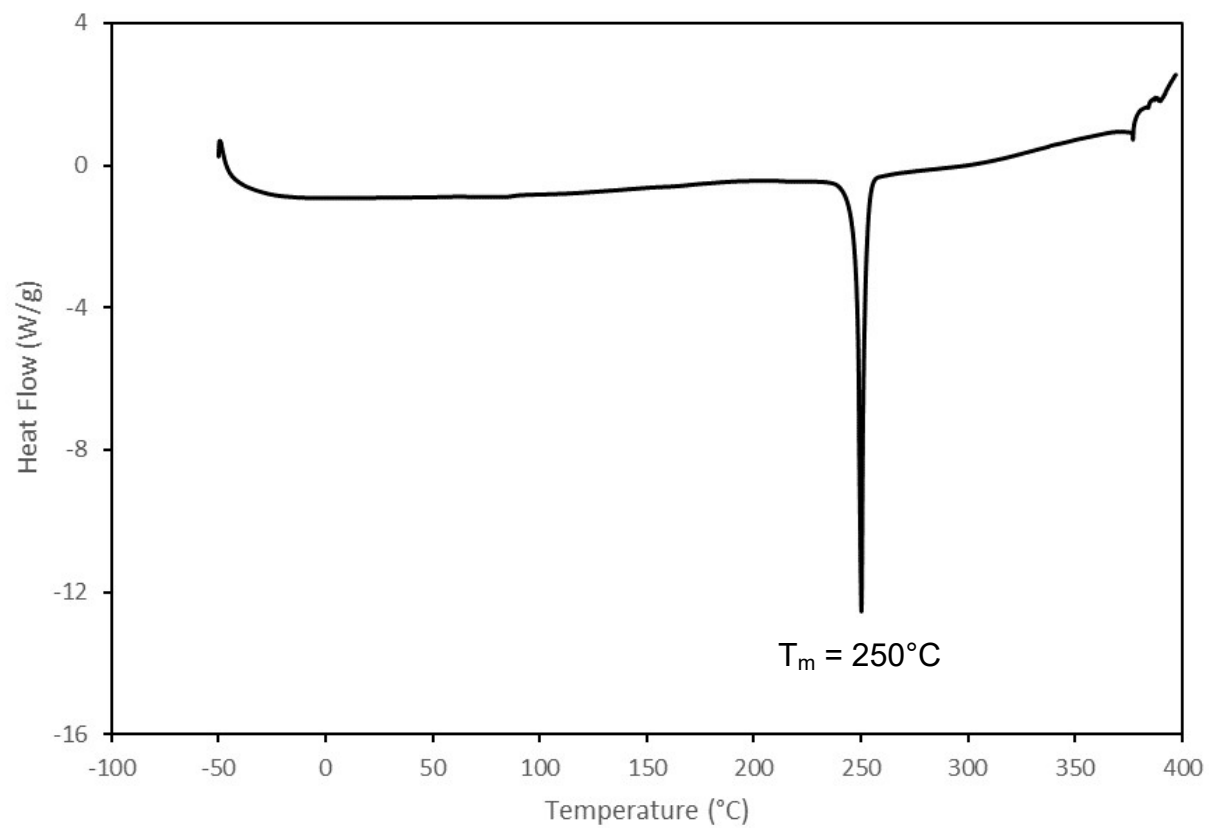

**Figure S4.** DSC trace of poly(vinylphenol) synthesized from *p*-coumaric acid.

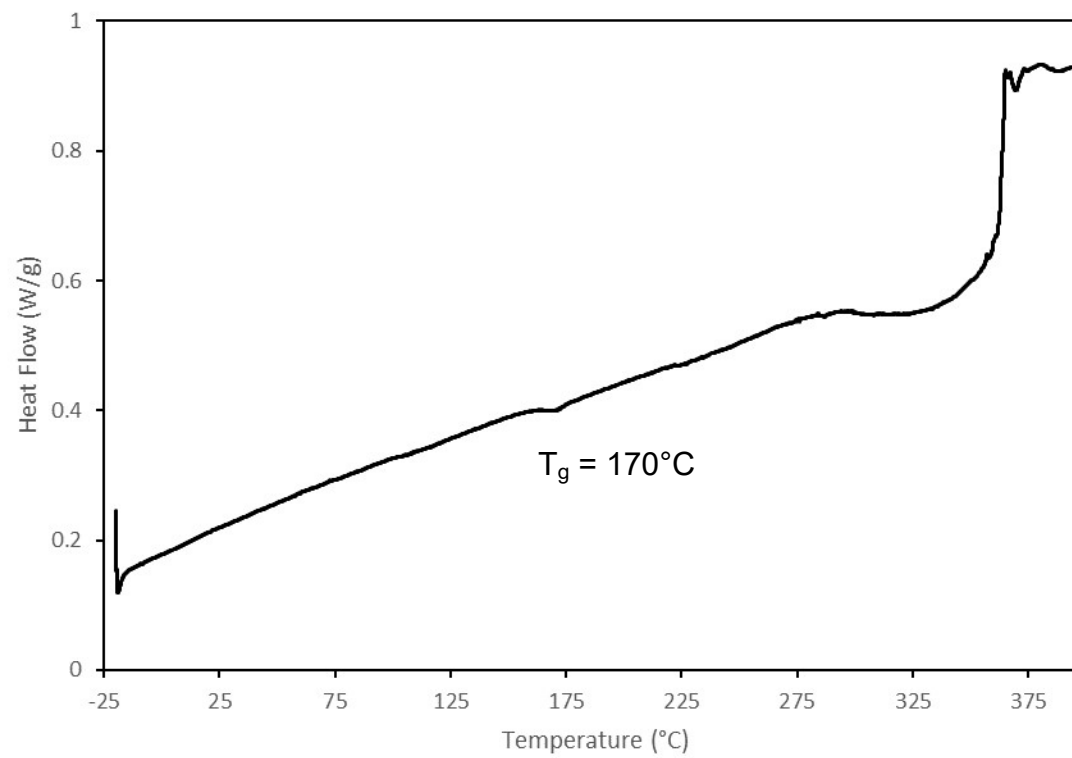

**Figure S5.** DSC trace of an 8:2 cis/trans mixture of compound 1.

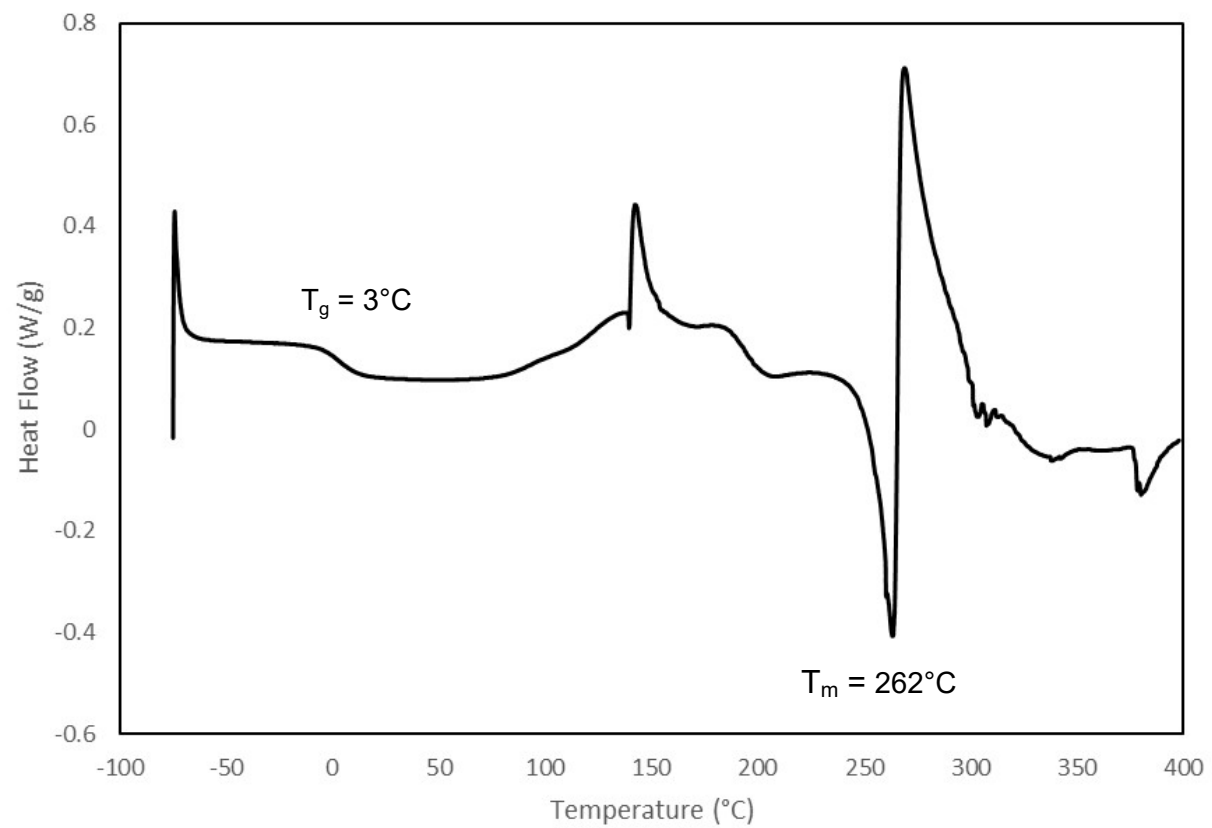

## GPC of PVP

**Figure S6** Gel permeation chromatography data for poly(vinylphenol) synthesized from *p*-coumaric acid.

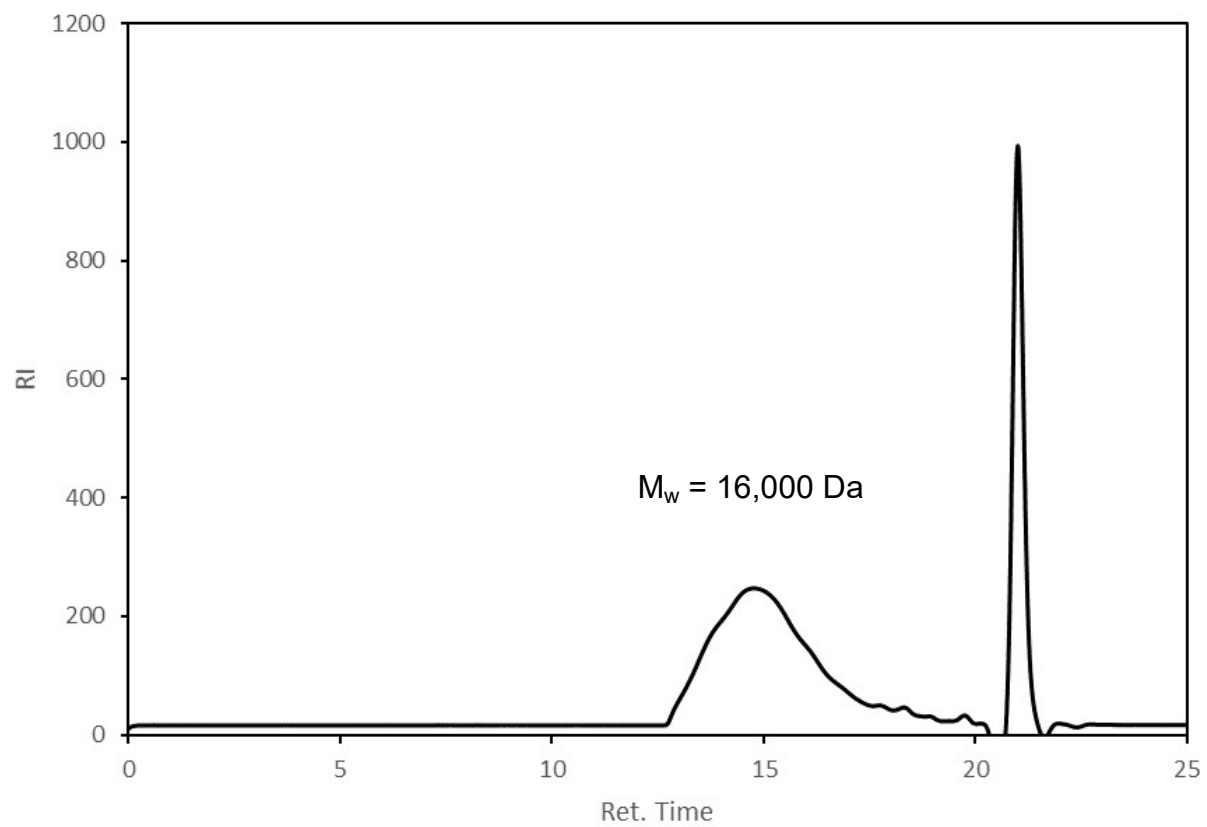



## Crystallographic Data

**Table S1.** Crystal data and structure refinement for Compound **3**.

|                                             |                                                               |
|---------------------------------------------|---------------------------------------------------------------|
| Identification code                         | Compound 3                                                    |
| Empirical formula                           | C <sub>18</sub> H <sub>20</sub> O <sub>6</sub>                |
| Formula weight                              | 332.36                                                        |
| Temperature/K                               | 100                                                           |
| Crystal system                              | monoclinic                                                    |
| Space group                                 | P2 <sub>1</sub> /n                                            |
| a/Å                                         | 6.3732(5)                                                     |
| b/Å                                         | 9.3953(8)                                                     |
| c/Å                                         | 13.6384(12)                                                   |
| α/°                                         | 90                                                            |
| β/°                                         | 101.205(3)                                                    |
| γ/°                                         | 90                                                            |
| Volume/Å <sup>3</sup>                       | 801.08(12)                                                    |
| Z                                           | 2                                                             |
| ρ <sub>calc</sub> /g/cm <sup>3</sup>        | 1.3778                                                        |
| μ/mm <sup>-1</sup>                          | 0.103                                                         |
| F(000)                                      | 352.2                                                         |
| Crystal size/mm <sup>3</sup>                | 0.316 × 0.198 × 0.152                                         |
| Radiation                                   | Mo Kα (λ = 0.71073)                                           |
| 2θ range for data collection/°              | 5.3 to 50.68                                                  |
| Index ranges                                | -7 ≤ h ≤ 7, -11 ≤ k ≤ 11, -16 ≤ l ≤ 16                        |
| Reflections collected                       | 9131                                                          |
| Independent reflections                     | 1468 [R <sub>int</sub> = 0.0340, R <sub>sigma</sub> = 0.0228] |
| Data/restraints/parameters                  | 1468/0/113                                                    |
| Goodness-of-fit on F <sup>2</sup>           | 1.064                                                         |
| Final R indexes [I >= 2σ (I)]               | R <sub>1</sub> = 0.0362, wR <sub>2</sub> = 0.0845             |
| Final R indexes [all data]                  | R <sub>1</sub> = 0.0411, wR <sub>2</sub> = 0.0877             |
| Largest diff. peak/hole / e Å <sup>-3</sup> | 0.21/-0.20                                                    |

**Table S2.** Fractional Atomic Coordinates ( $\times 10^4$ ) and Equivalent Isotropic Displacement Parameters ( $\text{\AA}^2 \times 10^3$ ) for Compound **3**.  $U_{\text{eq}}$  is defined as 1/3 of the trace of the orthogonalised  $U_{ij}$  tensor.

| Atom   | x          | y          | z          | U(eq)   |
|--------|------------|------------|------------|---------|
| O(001) | 2269.2(15) | 6907.5(11) | 1135.6(7)  | 22.0(3) |
| O(002) | 8645.7(15) | 8548.6(11) | 3054.0(7)  | 24.3(3) |
| O(003) | 5739.4(16) | 8531.6(11) | 1360.4(7)  | 24.7(3) |
| C(004) | 4776(2)    | 5991.4(14) | 3742.5(10) | 16.9(3) |
| C(005) | 5444(2)    | 7693.2(14) | 2146.1(10) | 18.5(3) |
| C(006) | 6622(2)    | 6822.8(14) | 3835.2(10) | 17.5(3) |
| C(007) | 3617(2)    | 6854.9(14) | 2049.8(10) | 17.6(3) |
| C(008) | 4343(2)    | 5100.3(14) | 4561.6(10) | 17.8(3) |
| C(009) | 3282(2)    | 6015.8(14) | 2842.9(10) | 18.0(3) |
| C(00A) | 6934(2)    | 7662.8(14) | 3044.8(10) | 18.0(3) |
| C(00B) | 162(2)     | 6358.0(17) | 1076.2(11) | 25.2(4) |
| C(00C) | 10225(2)   | 8563.1(17) | 3959.4(11) | 26.1(4) |

**Table S3.** Anisotropic Displacement Parameters ( $\text{\AA}^2 \times 10^3$ ) for Compound **3**. The Anisotropic displacement factor exponent takes the form:  $-2\pi^2[h^2a^2U_{11}+2hka^*b^*U_{12}+\dots]$ .

| Atom   | $U_{11}$ | $U_{22}$ | $U_{33}$ | $U_{12}$ | $U_{13}$ | $U_{23}$ |
|--------|----------|----------|----------|----------|----------|----------|
| O(001) | 20.0(5)  | 28.5(6)  | 15.3(5)  | -0.7(4)  | -2.0(4)  | 4.9(4)   |
| O(002) | 22.0(5)  | 28.6(6)  | 20.5(5)  | -7.9(4)  | 0.0(4)   | 6.5(4)   |
| O(003) | 22.1(5)  | 30.2(6)  | 20.9(5)  | -2.6(4)  | 2.4(4)   | 10.9(4)  |
| C(004) | 20.5(7)  | 15.3(7)  | 15.0(6)  | 1.4(5)   | 3.8(5)   | -1.8(5)  |
| C(005) | 22.1(7)  | 18.2(7)  | 15.8(7)  | 3.1(6)   | 5.3(5)   | 3.9(5)   |
| C(006) | 19.9(7)  | 19.0(7)  | 12.8(6)  | 1.0(6)   | 0.9(5)   | -0.8(5)  |
| C(007) | 19.5(7)  | 18.2(7)  | 13.9(7)  | 4.2(5)   | 0.5(5)   | -0.3(5)  |
| C(008) | 19.7(7)  | 16.6(7)  | 17.3(7)  | -2.8(5)  | 3.8(5)   | -1.5(5)  |
| C(009) | 18.4(7)  | 17.0(7)  | 18.2(7)  | -1.0(5)  | 2.3(5)   | -0.5(5)  |
| C(00A) | 17.8(7)  | 17.0(7)  | 19.6(7)  | 0.0(5)   | 4.3(5)   | -1.1(5)  |
| C(00B) | 18.5(7)  | 34.0(8)  | 20.6(7)  | 0.6(6)   | -2.4(6)  | 1.4(6)   |

|        |         |         |         |         |         |        |
|--------|---------|---------|---------|---------|---------|--------|
| C(00C) | 24.8(8) | 30.1(8) | 21.0(7) | -9.5(6) | -1.5(6) | 1.9(6) |
|--------|---------|---------|---------|---------|---------|--------|

**Table S4.** Bond Lengths for Compound **3**.

| Atom   | Atom   | Length/Å   | Atom   | Atom   | Length/Å   |
|--------|--------|------------|--------|--------|------------|
| O(001) | C(007) | 1.3705(15) | C(004) | C(009) | 1.3993(18) |
| O(001) | C(00B) | 1.4266(17) | C(005) | C(007) | 1.391(2)   |
| O(002) | C(00A) | 1.3705(17) | C(005) | C(00A) | 1.3972(19) |
| O(002) | C(00C) | 1.4336(16) | C(006) | C(00A) | 1.3811(19) |
| O(003) | C(005) | 1.3722(16) | C(007) | C(009) | 1.3880(19) |
| C(004) | C(006) | 1.3972(19) | C(008) | C(008) | 1.333(3)   |
| C(004) | C(008) | 1.4645(18) |        |        |            |

**Table S5.** Bond Angles for Compound **3**.

| Atom   | Atom   | Atom   | Angle/°    | Atom                | Atom   | Atom   | Angle/°    |
|--------|--------|--------|------------|---------------------|--------|--------|------------|
| C(00B) | O(001) | C(007) | 117.08(10) | C(005)              | C(007) | O(001) | 115.51(12) |
| C(00C) | O(002) | C(00A) | 115.99(11) | C(009)              | C(007) | O(001) | 124.44(12) |
| C(008) | C(004) | C(006) | 122.05(12) | C(009)              | C(007) | C(005) | 120.04(12) |
| C(009) | C(004) | C(006) | 119.18(12) | C(008) <sup>1</sup> | C(008) | C(004) | 125.90(16) |
| C(009) | C(004) | C(008) | 118.77(12) | C(007)              | C(009) | C(004) | 120.75(12) |
| C(007) | C(005) | O(003) | 119.39(12) | C(005)              | C(00A) | O(002) | 113.56(12) |
| C(00A) | C(005) | O(003) | 121.59(12) | C(006)              | C(00A) | O(002) | 125.10(12) |
| C(00A) | C(005) | C(007) | 119.01(12) | C(006)              | C(00A) | C(005) | 121.34(12) |
| C(00A) | C(006) | C(004) | 119.68(12) |                     |        |        |            |

**Table S6.** Hydrogen Atom Coordinates ( $\text{Å} \times 10^4$ ) and Isotropic Displacement Parameters ( $\text{Å}^2 \times 10^3$ ) for Compound **3**.

| Atom | x | y | z | U(eq) |
|------|---|---|---|-------|
|------|---|---|---|-------|

**Table S6.** Hydrogen Atom Coordinates ( $\text{\AA}\times 10^4$ ) and Isotropic Displacement Parameters ( $\text{\AA}^2\times 10^3$ ) for Compound **3**.

| <b>Atom</b> | <b>x</b>  | <b>y</b>   | <b>z</b>   | <b>U(eq)</b> |
|-------------|-----------|------------|------------|--------------|
| H(009)      | 2025(2)   | 5451.7(14) | 2774.3(10) | 21.6(4)      |
| H(006)      | 7657(2)   | 6810.5(14) | 4439.0(10) | 21.0(4)      |
| H(003)      | 6846(16)  | 9028(14)   | 1534(4)    | 37.0(4)      |
| H(008)      | 3005(2)   | 4622.1(14) | 4459.0(10) | 21.4(4)      |
| H(00a)      | -719(5)   | 6605(10)   | 427(3)     | 37.8(5)      |
| H(00b)      | 227(3)    | 5321(2)    | 1150(8)    | 37.8(5)      |
| H(00c)      | -471(6)   | 6771(8)    | 1611(5)    | 37.8(5)      |
| H(00d)      | 11358(9)  | 9241(8)    | 3893(3)    | 39.2(5)      |
| H(00e)      | 9556(4)   | 8848(11)   | 4518.0(17) | 39.2(5)      |
| H(00f)      | 10842(12) | 7609(3)    | 4086(4)    | 39.2(5)      |

**Figure S7.** Unit Cell of Compound 3.

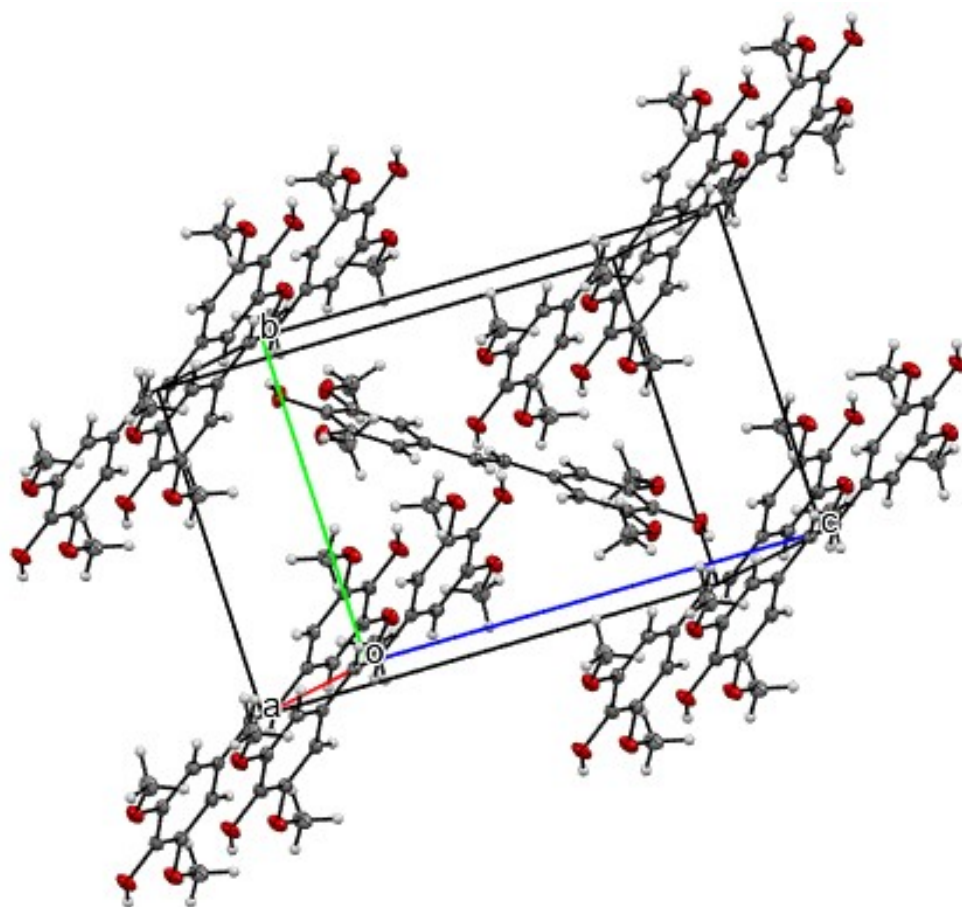

# NMR Spectra of Isolated Compounds

**Figure S8.**  $^1\text{H}$  NMR Spectrum of Compound **1**.

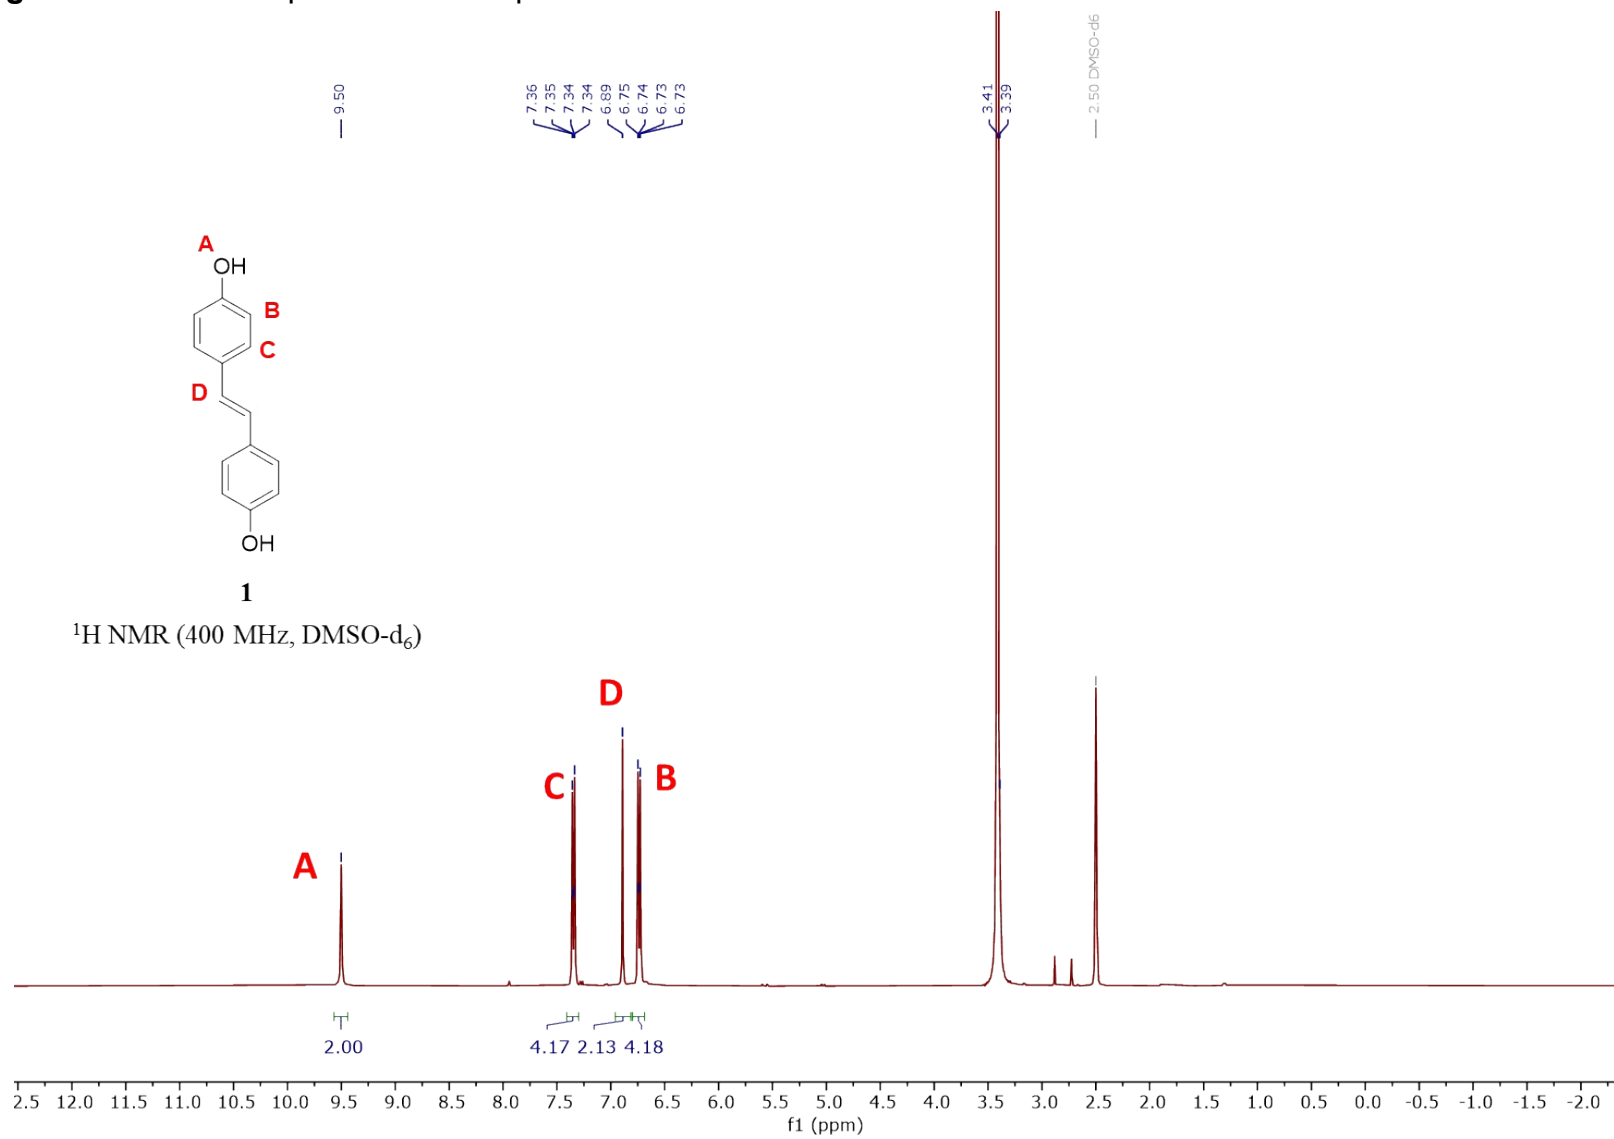

Figure S9.  $^{13}\text{C}$  NMR Spectrum of Compound 1.

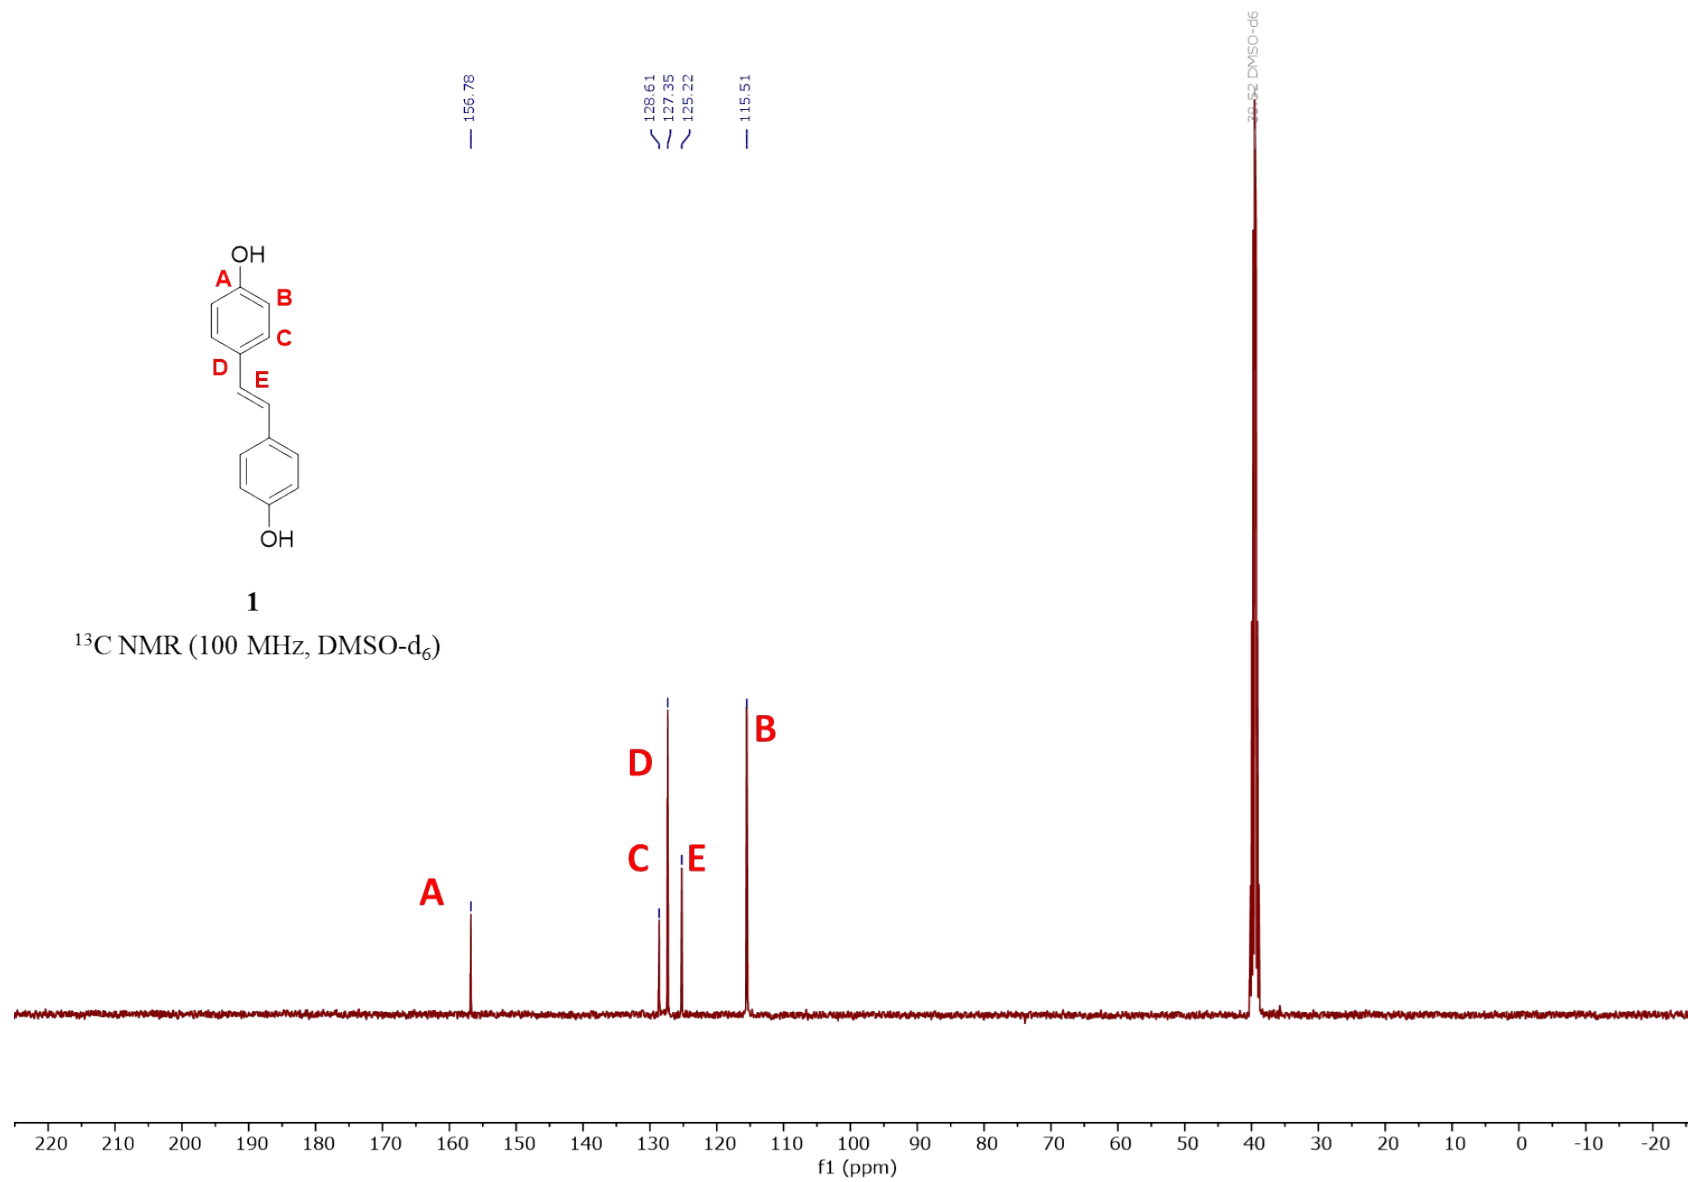

**Figure S10.**  $^1\text{H}$  NMR Spectrum of Compound **2**.

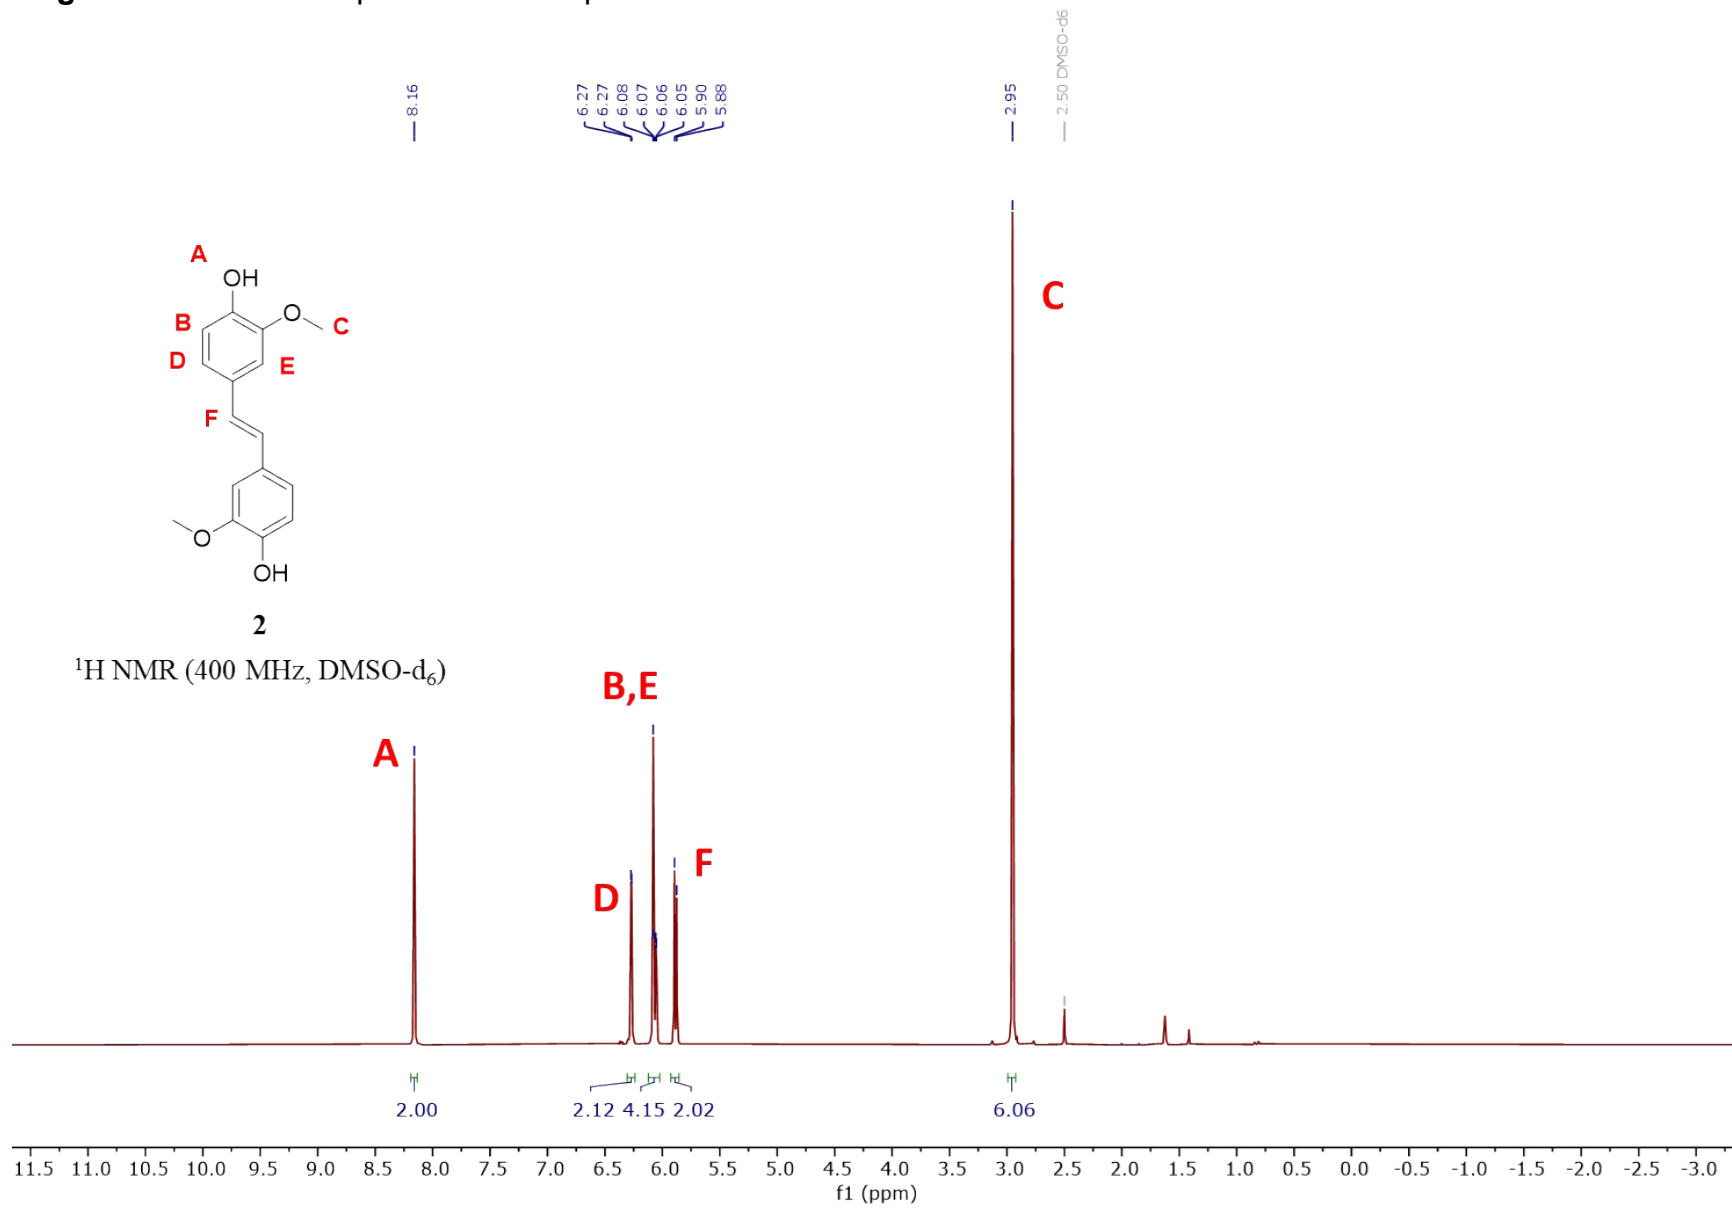



Figure S11 <sup>13</sup>C NMR Spectrum of Compound 2.

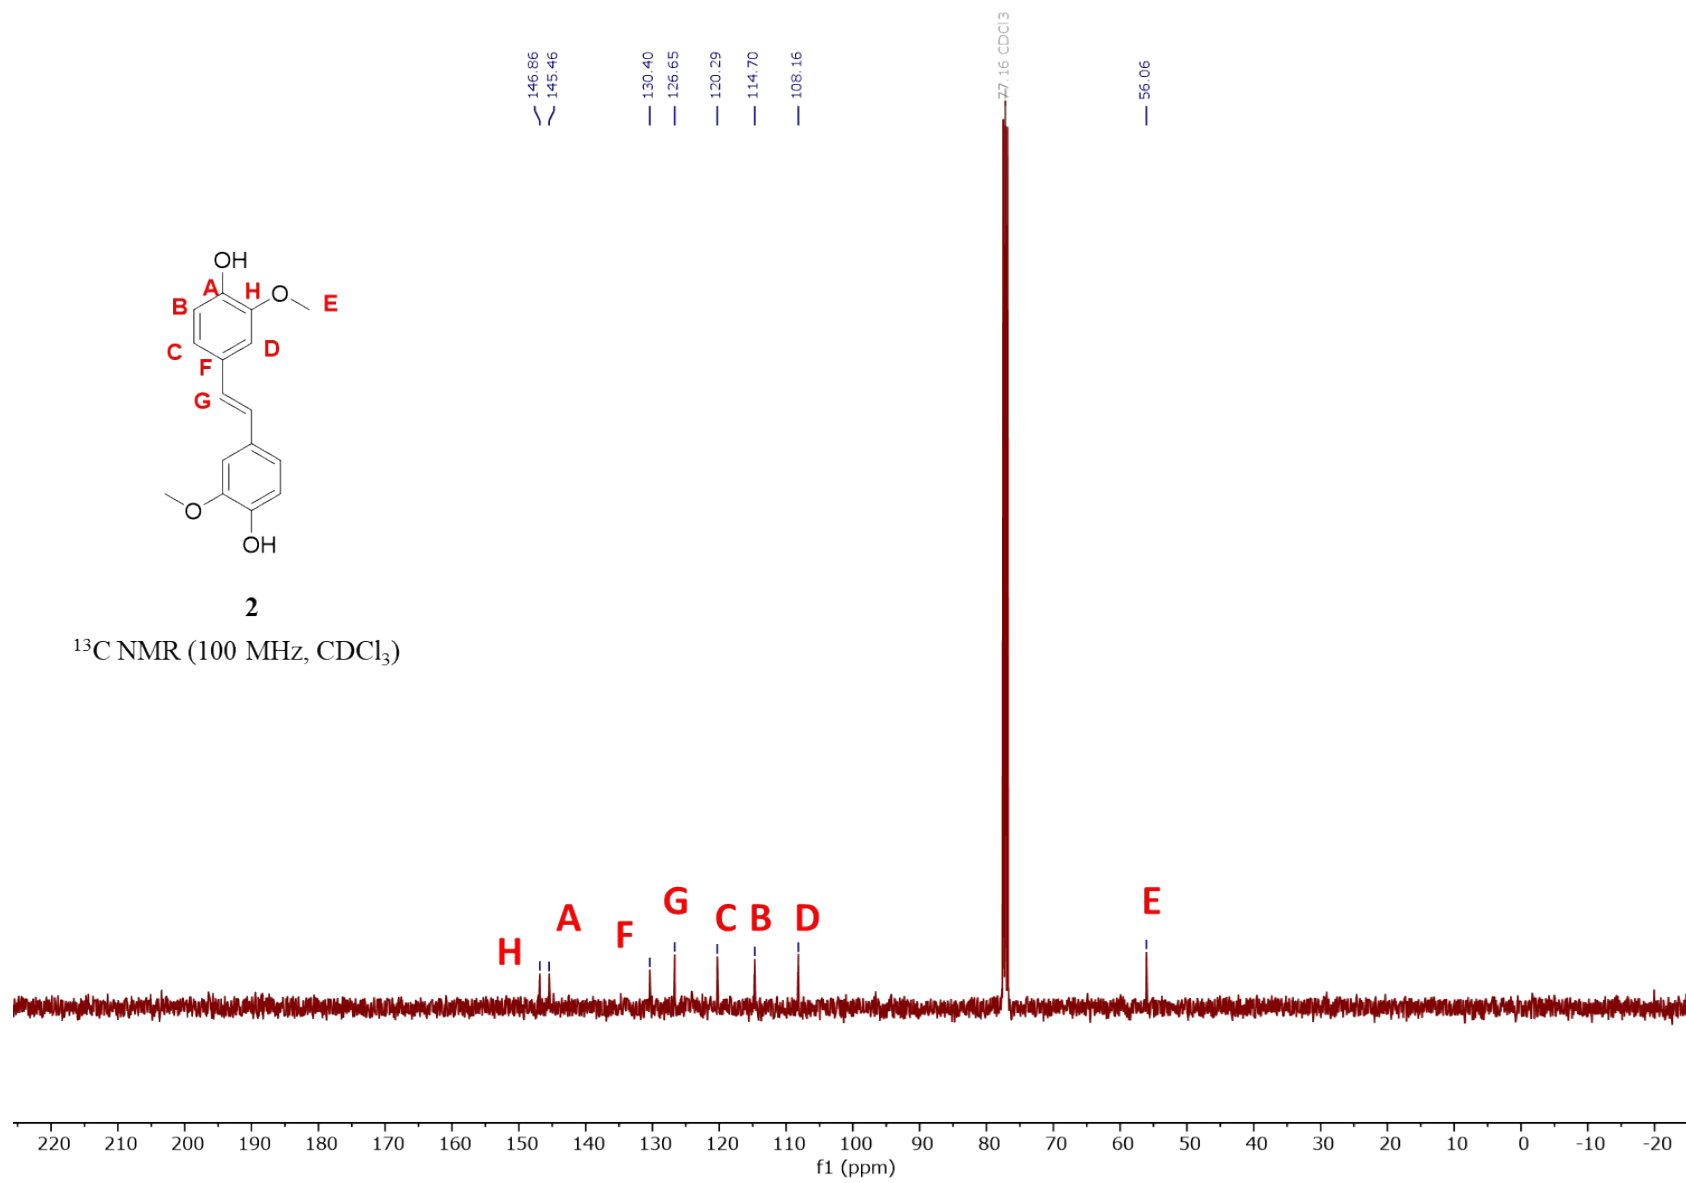

Figure S12. <sup>1</sup>H NMR Spectrum of Compound 3.

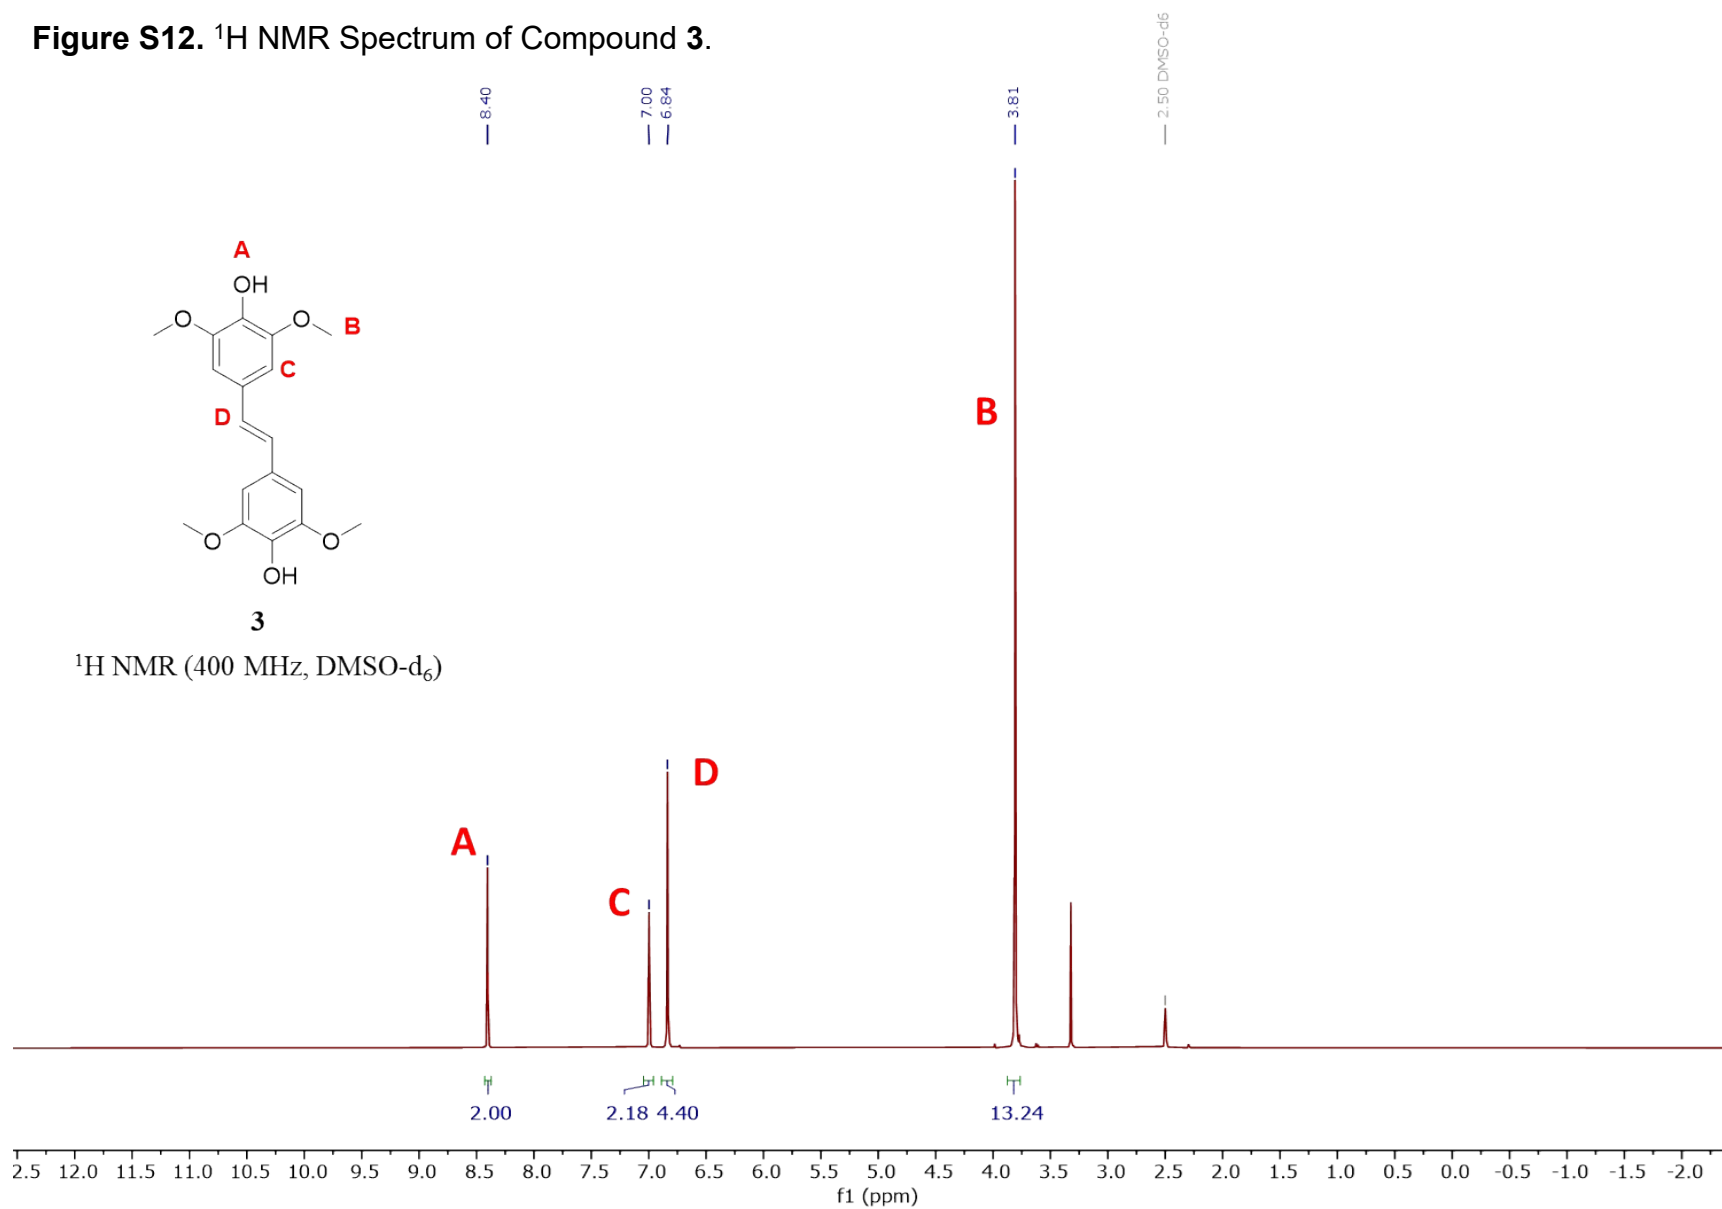

**Figure S13.**  $^{13}\text{C}$  NMR Spectrum of Compound **3**.

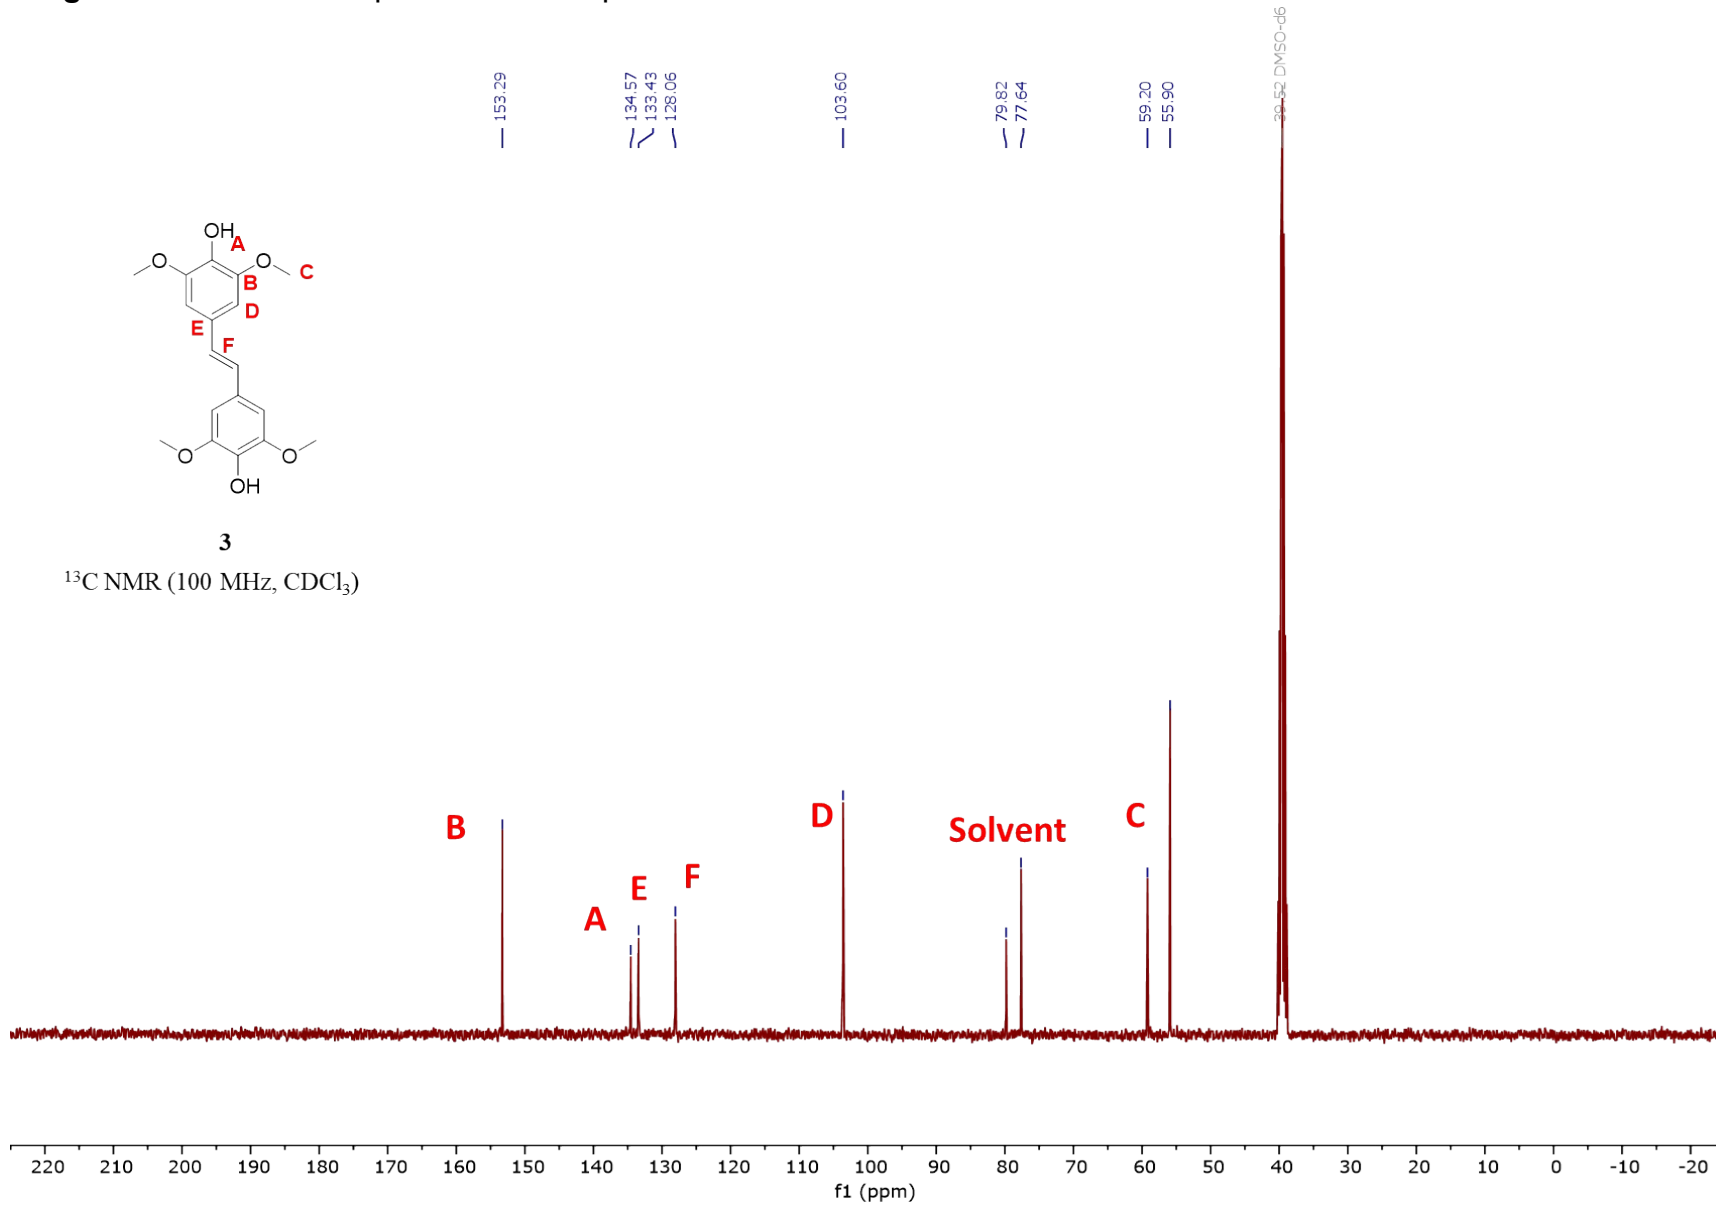

Figure S14. <sup>1</sup>H NMR Spectrum of Compound 4.

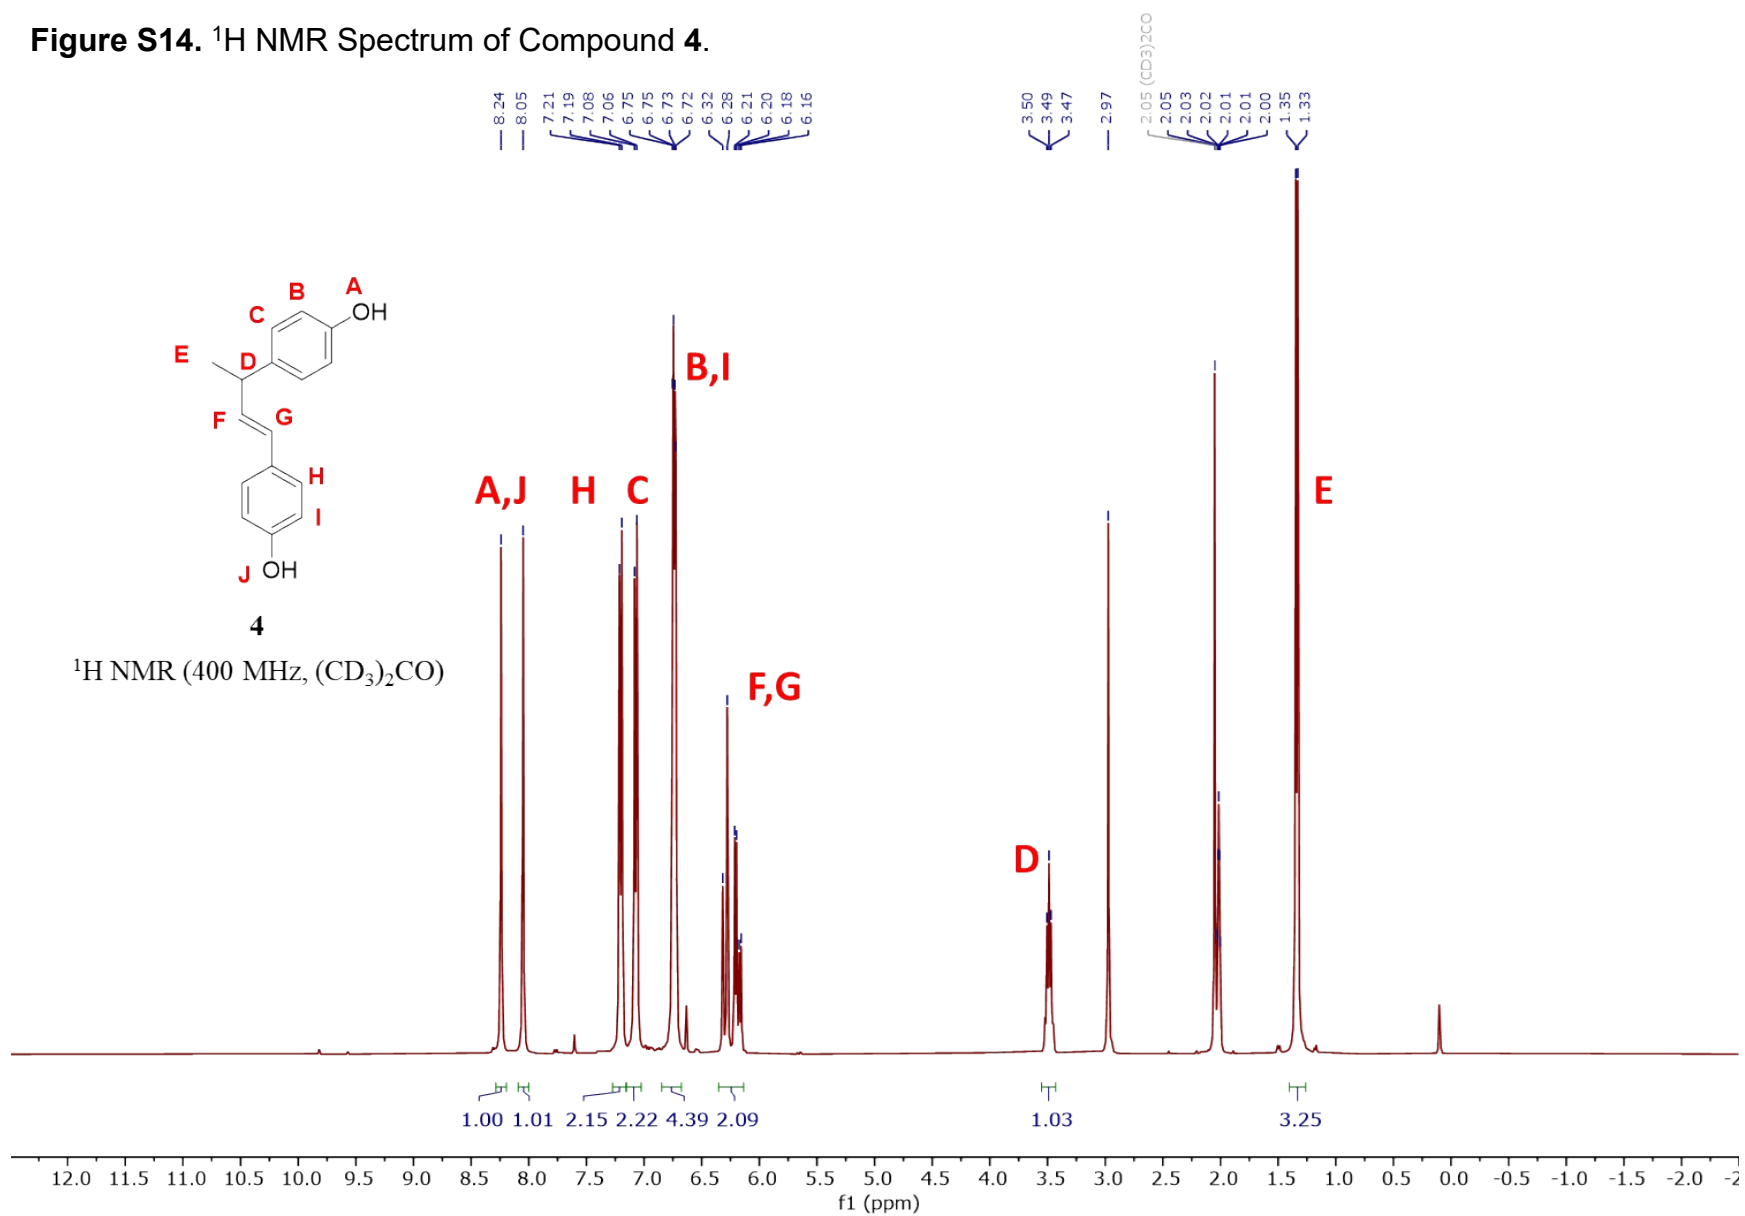

Figure S15.  $^{13}\text{C}$  NMR Spectrum of Compound 4.

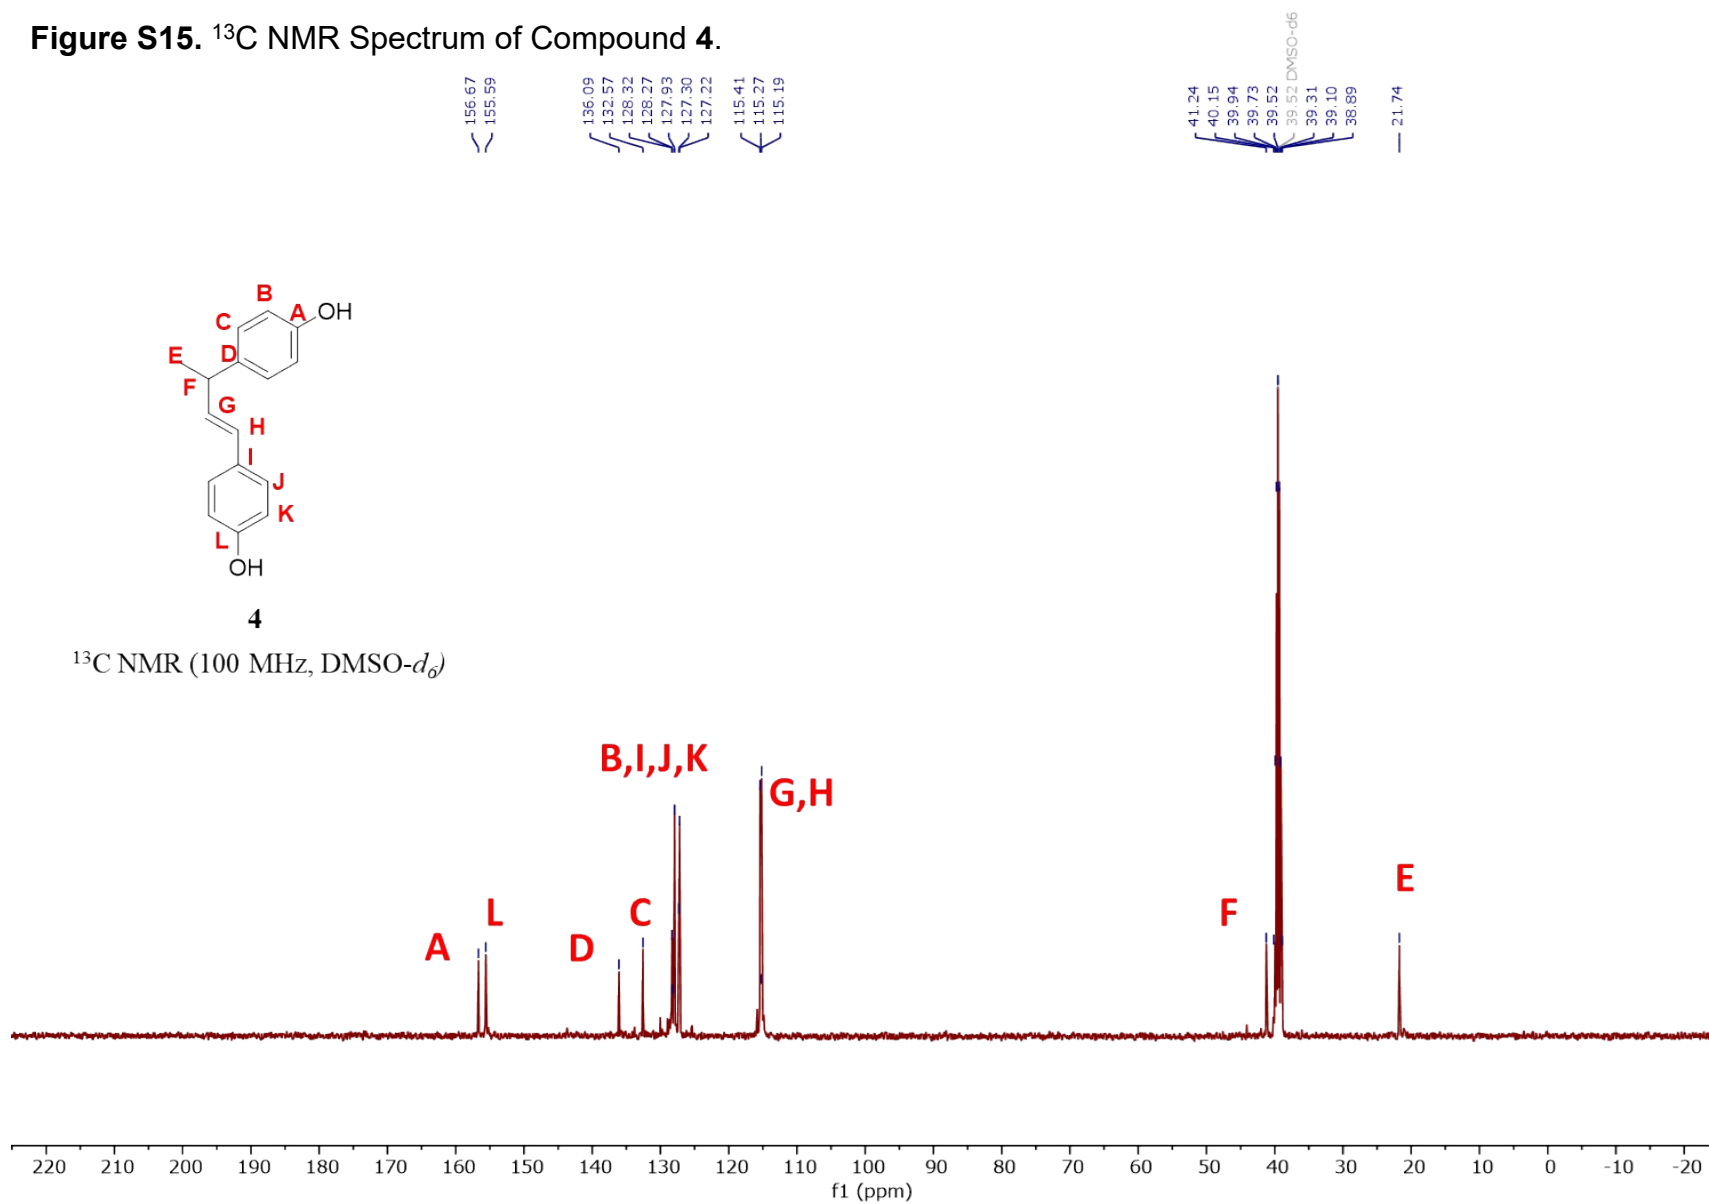

Figure S16. <sup>1</sup>H NMR Spectrum of Poly(Vinylphenol)

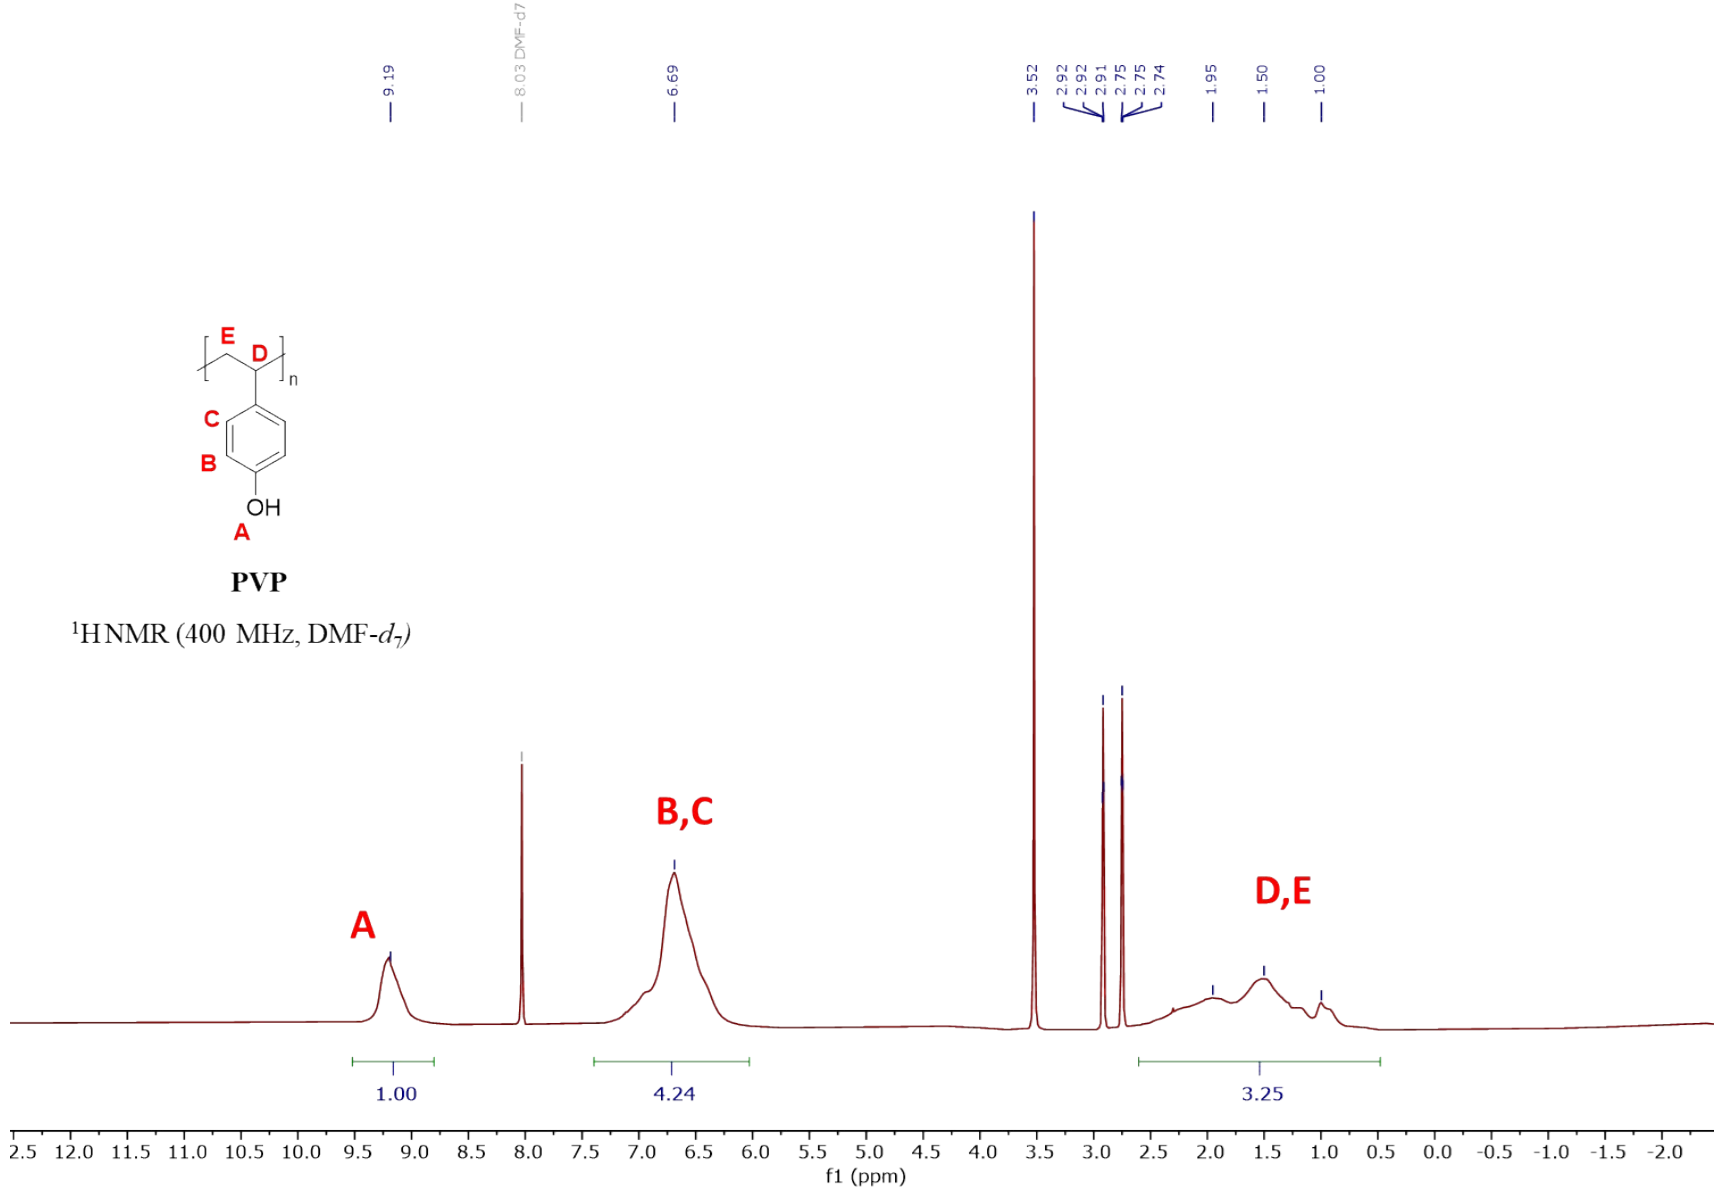

Figure S17.  $^{13}\text{C}$  NMR Spectrum of Poly(Vinylphenol).

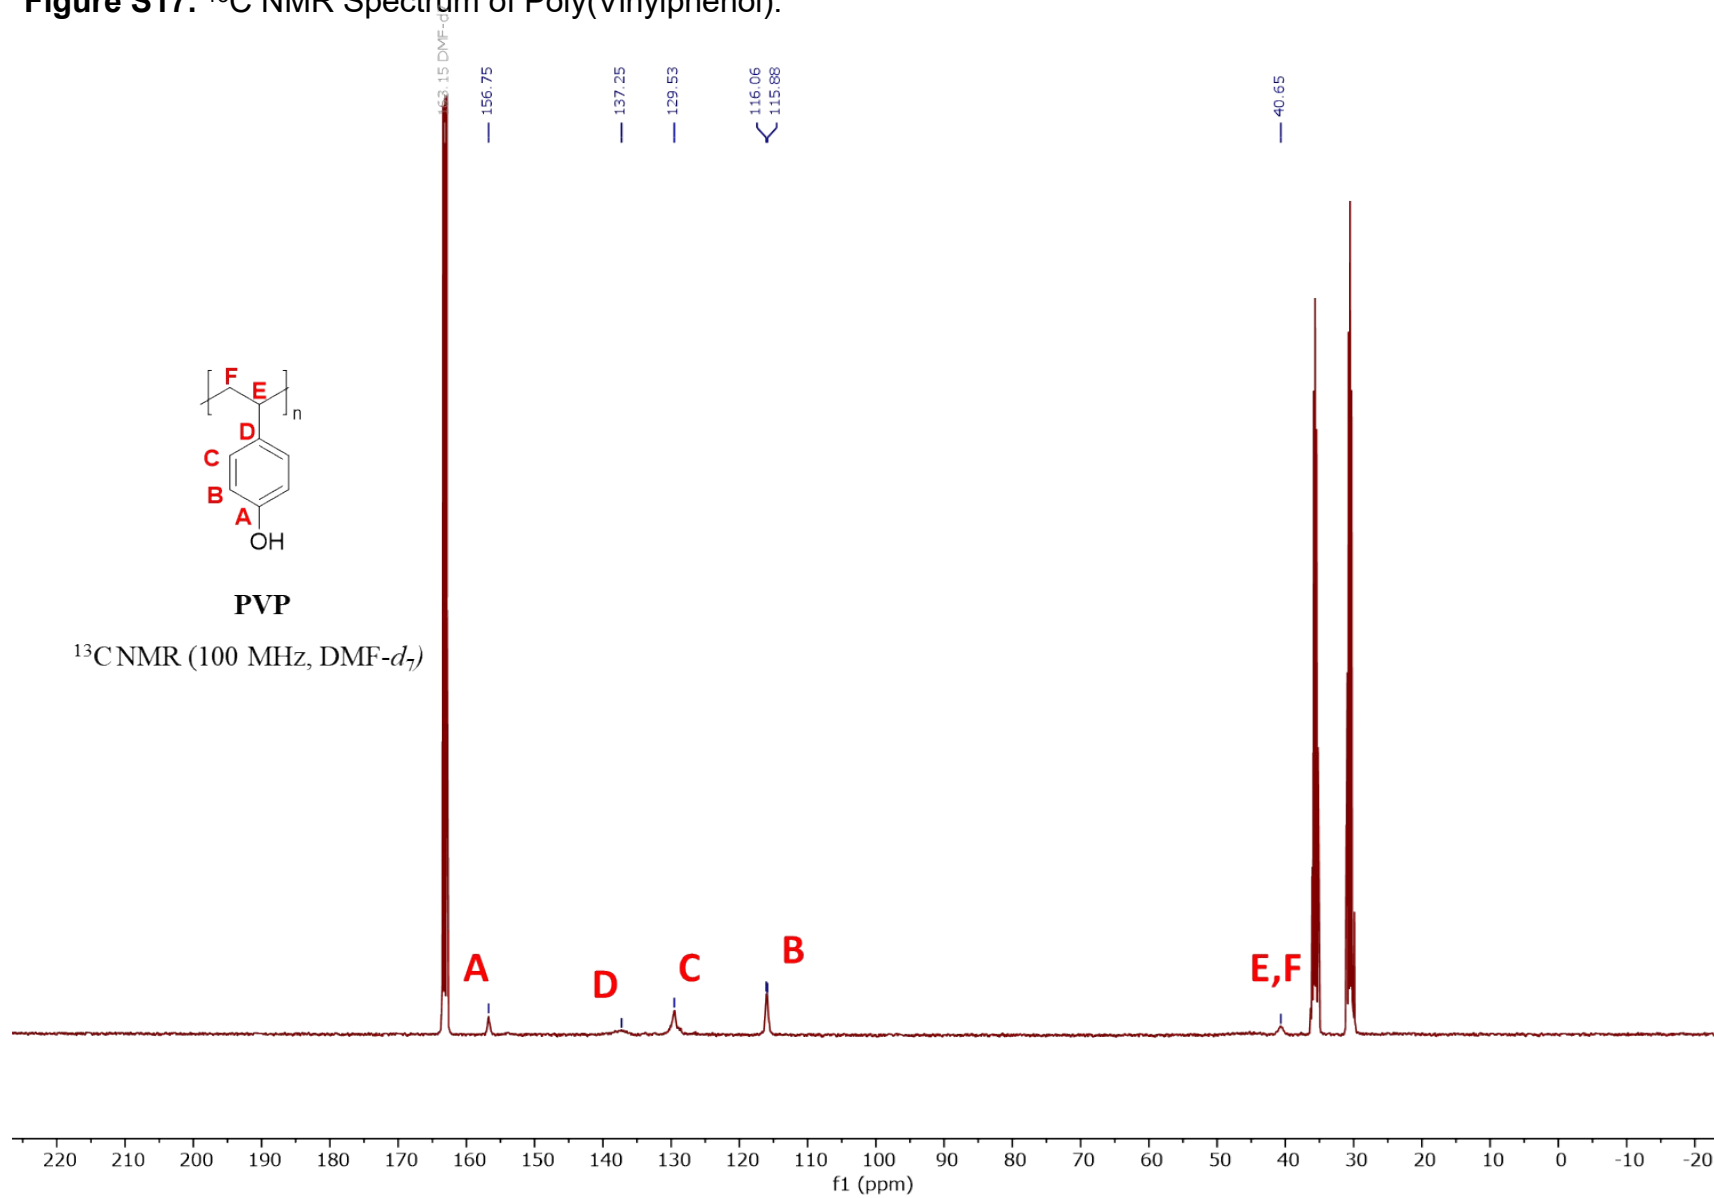

Figure S18. <sup>1</sup>H NMR of Cis/Trans Mixture of Compound 1.

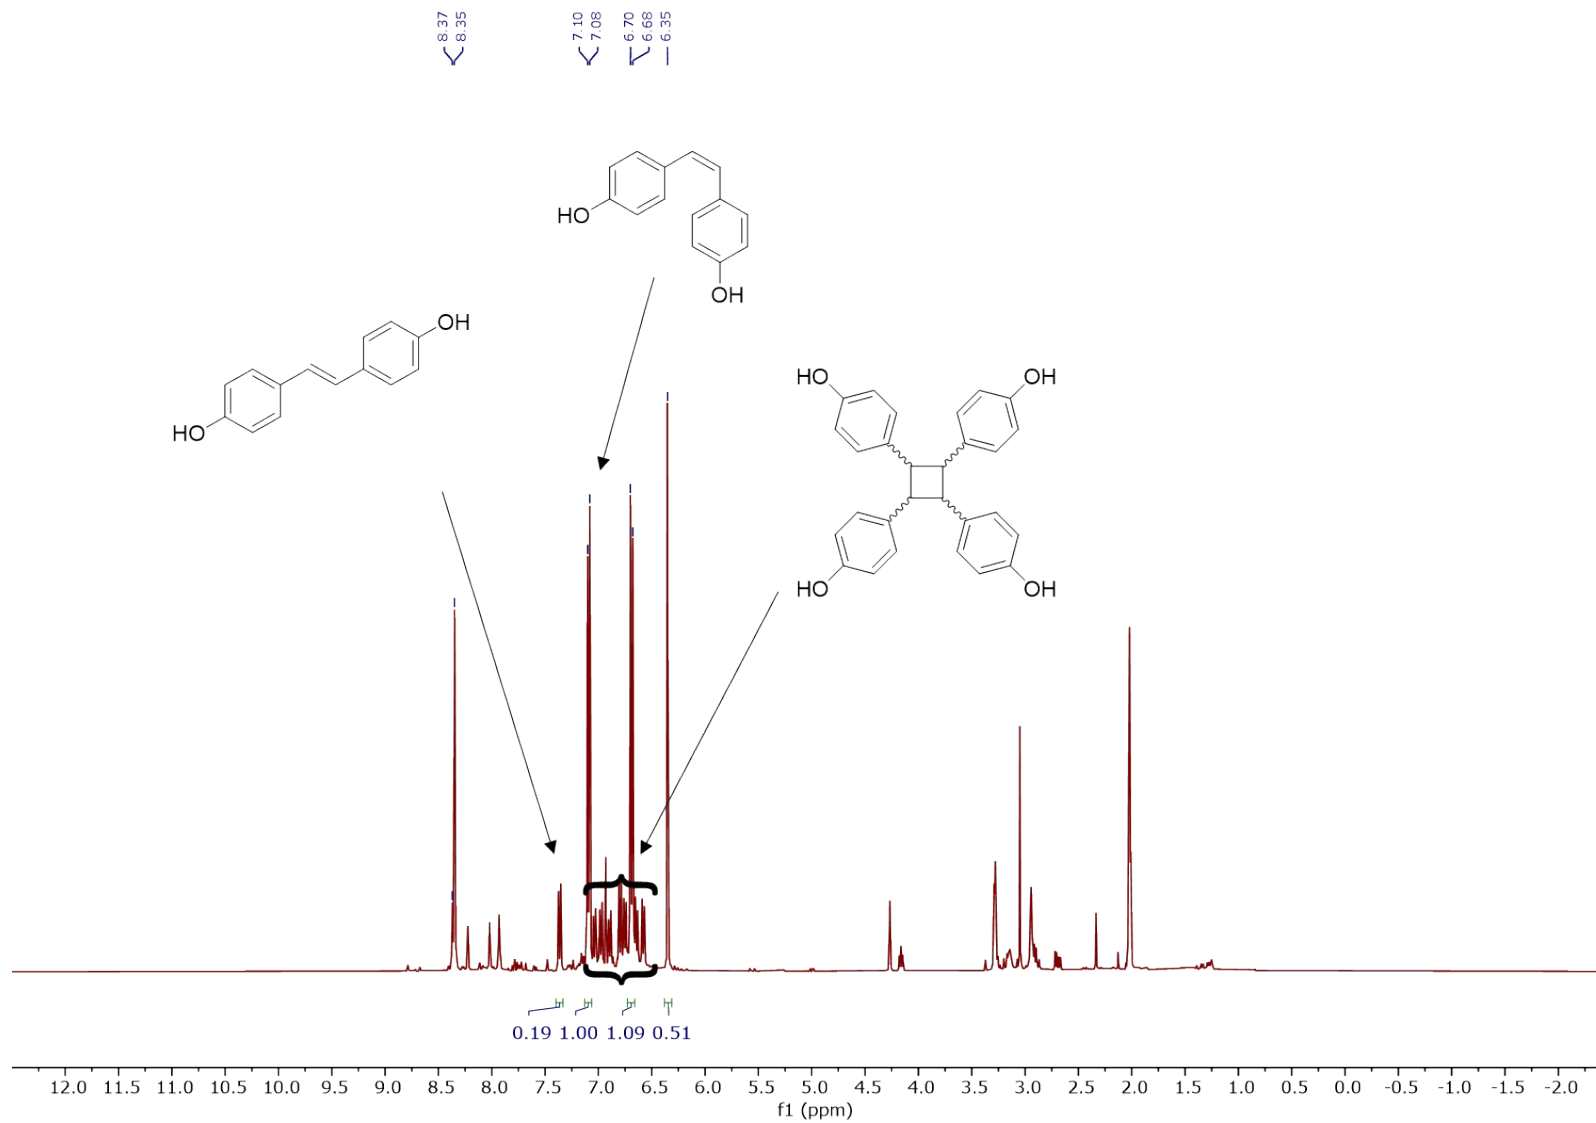

Supplement: d3su00175j1.pdf [file d3su00175j1.pdf]
